# Supplementary material for: Cuentas de la Cofradía astorgana de "Las Cinco Llagas"
Source: MDPI journal article supplement (doi:10.3390/insects14020208), 1971-01-01
Supplement: s1 [file s1]

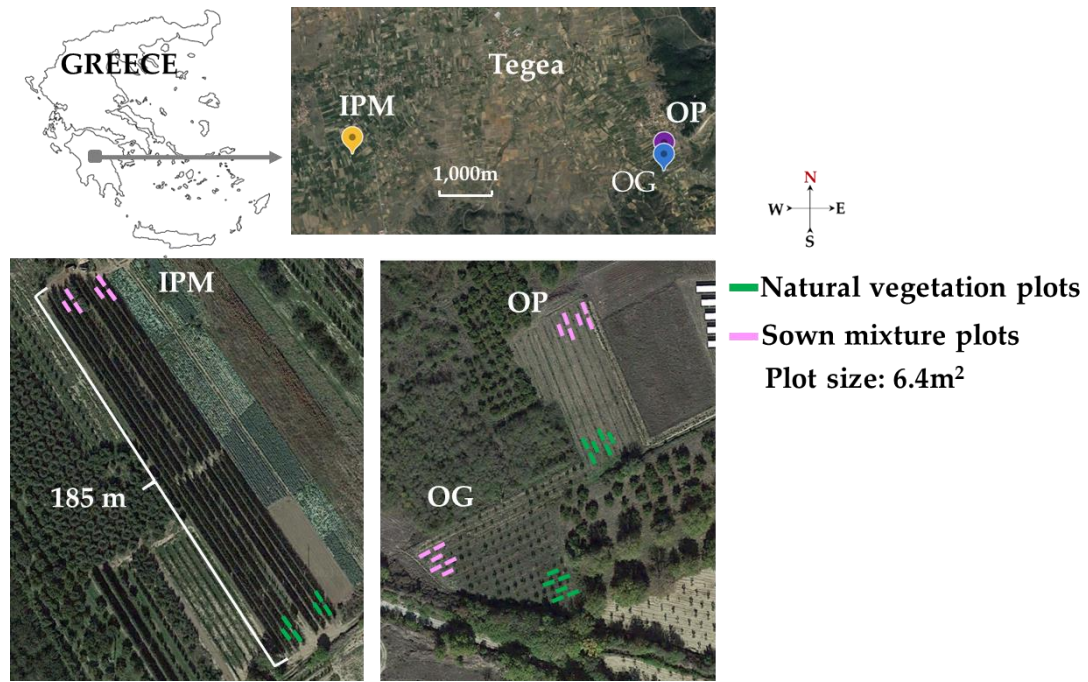

**Figure S1:** Experimentation sites of two organic orchards (OP: Organic palmette orchard, OG: Organic goblet orchard) and one IPM orchard (37.43705, 22.46942; 37.43658, 22.46895; 37.4415, 22.40492) in Tegea plateau, Peloponnese, Greece, and example of the layout of the sown flowering mixture patches (FM) (pink blocks) and the natural vegetation patches (NV) (green blocks) in the apple orchards where the presence of pollinators was recorded.

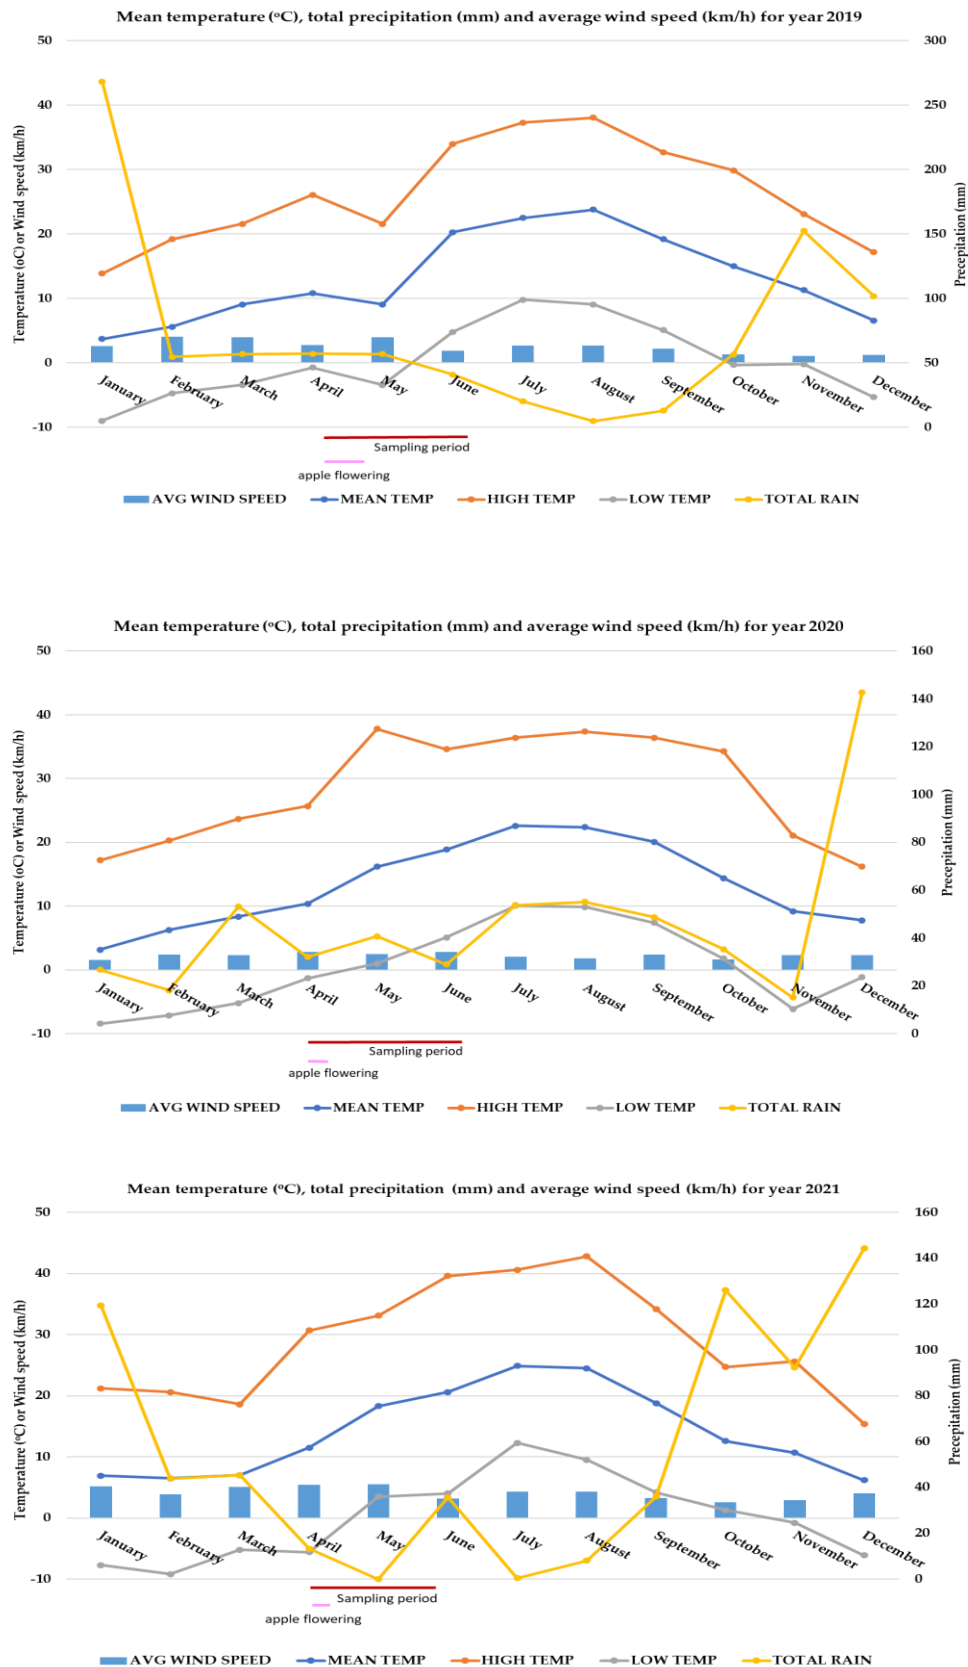

**Figure S2:** Meteorological data [Temperature (°C), rain (mm), wind speed (km/hr)] for years 2019, 2020, 2021 from the National Observatory of Athens. Meteorological station “Tripoli (LG83)”, elevation: 646m latitude: 37° 30' 34" N, longitude: 22° 25' 04" E.

**Table S1.** Mean number of honey bee and wild bee visits/patch/1' ( $\pm$  s.e.m.) in the sown flowering mixture (FM) patches and the natural vegetation (NV) patches of groundcover, at three apple orchards (IPM, OP, OG), in three consecutive years 2019, 2020, 2021 (recordings from April to June).

| Honey bees                     |                                                                                                                                                 |                |                                                                                                                                                   |                |                                                                                                                                                |                 |
|--------------------------------|-------------------------------------------------------------------------------------------------------------------------------------------------|----------------|---------------------------------------------------------------------------------------------------------------------------------------------------|----------------|------------------------------------------------------------------------------------------------------------------------------------------------|-----------------|
|                                | Baseline Year 2019                                                                                                                              |                |                                                                                                                                                   |                |                                                                                                                                                |                 |
| Orchard /Date                  | IPM (2 sites)                                                                                                                                   |                | OP                                                                                                                                                |                | OG                                                                                                                                             |                 |
|                                | Site a                                                                                                                                          | Site b         |                                                                                                                                                   |                |                                                                                                                                                |                 |
| 01 May 2019                    | 0.00 ± 0.00                                                                                                                                     | 0.17 ± 0.17    | 0.00 ± 0.00                                                                                                                                       |                | 0.00 ± 0.00                                                                                                                                    |                 |
| 17 May 2019                    | 0.00 ± 0.00                                                                                                                                     | 0.00 ± 0.00    | 0.00 ± 0.00                                                                                                                                       |                | 0.33 ± 0.33                                                                                                                                    |                 |
| 22 June 2019                   | 0.17 ± 0.17                                                                                                                                     | 0.00 ± 0.00    | 0.33 ± 0.21                                                                                                                                       |                | 0.33 ± 0.21                                                                                                                                    |                 |
| 2-way ANOVA                    | Orchard: F <sub>2,63</sub> =1.34, p=0.2691; Date: F <sub>2,63</sub> =2.19, p= 0.1204; Orchard *Date: F <sub>4,63</sub> =1.17, p= 0.3313         |                |                                                                                                                                                   |                |                                                                                                                                                |                 |
|                                | Year 2020                                                                                                                                       |                |                                                                                                                                                   |                |                                                                                                                                                |                 |
| Orchard<br>/Treatment/<br>Date | IPM                                                                                                                                             |                | OP                                                                                                                                                |                | OG                                                                                                                                             |                 |
|                                | FM                                                                                                                                              | NV             | FM                                                                                                                                                | NV             | FM                                                                                                                                             | NV              |
| 13 Apr. 2020                   | 6.50 ± 1.23 Aa                                                                                                                                  | 0.00 ± 0.00 Bb | 5.17 ± 0.79 Aa                                                                                                                                    | 0.00 ± 0.00 Ba | 3.50 ± 0.43 Aa                                                                                                                                 | 0.00 ± 0.00Bab  |
| 17 Apr. 2020                   | 4.50 ± 1.43 Aa                                                                                                                                  | 0.00 ± 0.00 Bb | 1.50 ± 0.96 Ab                                                                                                                                    | 0.00 ± 0.00 Aa | 2.83 ± 0.91 Aab                                                                                                                                | 0.33 ± 0.33Bab  |
| 25 Apr. 2020                   | 0.00 ± 0.00 Ab                                                                                                                                  | 0.00 ± 0.00 Ab | 0.00 ± 0.00 Ab                                                                                                                                    | 0.67 ± 0.42 Aa | 1.00 ± 0.45 Aab                                                                                                                                | 0.00 ± 0.00Bab  |
| 08 May 2020                    | 1.00 ± 0.26 Ab                                                                                                                                  | 3.00 ± 1.13 Aa | 1.17 ± 0.54 Ab                                                                                                                                    | 0.00 ± 0.00 Aa | 2.83 ± 1.49 Aab                                                                                                                                | 0.00 ± 0.00Aab  |
| 16 May 2020                    | 1.17 ± 0.65 Ab                                                                                                                                  | 0.00 ± 0.00 Ab | 0.00 ± 0.00 Ab                                                                                                                                    | 0.00 ± 0.00 Aa | 0.50 ± 0.34 Aab                                                                                                                                | 0.17 ± 0.17Aab  |
| 25 May 2020                    | 0.00 ± 0.00 Ab                                                                                                                                  | 0.00 ± 0.00 Ab | 0.00 ± 0.00 Ab                                                                                                                                    | 0.00 ± 0.00 Aa | 0.00 ± 0.00 Ab                                                                                                                                 | 1.00 ± 0.63 Aa  |
| 12 June 2020                   | 0.00 ± 0.00 Ab                                                                                                                                  | 0.00 ± 0.00 Ab | 0.00 ± 0.00 Ab                                                                                                                                    | 0.00 ± 0.00 Aa | 0.00 ± 0.00 Ab                                                                                                                                 | 0.00 ± 0.00 Ab  |
| 26 June 2020                   | 0.00 ± 0.00 Ab                                                                                                                                  | 0.00 ± 0.00 Ab | 0.00 ± 0.00 Ab                                                                                                                                    | 0.00 ± 0.00 Aa | 0.00 ± 0.00 Ab                                                                                                                                 | 0.00 ± 0.00 Aab |
| 2-way ANOVA                    | Groundcover: F <sub>1,80</sub> =19.40, p<0.0001; Date: F <sub>7,80</sub> =10.12, p<0.0001; Groundcover*Date: F <sub>7,80</sub> =11.78, p<0.0001 |                | Groundcover: F <sub>1,70</sub> = 25.46, p<0.0001; Date: F <sub>6,70</sub> =11.81, p <0.0001; Groundcover*Date: F <sub>6,70</sub> =13.54, p<0.0001 |                | Groundcover: F <sub>1,70</sub> =20.52, p<0.0001; Date: F <sub>6,70</sub> =3.30, p <0.0001; Groundcover*Date: F <sub>6,70</sub> =4.74, p<0.0001 |                 |
|                                | Year 2021                                                                                                                                       |                |                                                                                                                                                   |                |                                                                                                                                                |                 |
| Orchard<br>/Treatment/<br>Date | IPM                                                                                                                                             |                | OP                                                                                                                                                |                | OG                                                                                                                                             |                 |
|                                | FM                                                                                                                                              | NV             | FM                                                                                                                                                | NV             | FM                                                                                                                                             | NV              |
| 09 Apr. 2021                   | 0.00 ± 0.00 Ab                                                                                                                                  | 0.00 ± 0.00 Aa | 0.83 ±0.48 Ad                                                                                                                                     | 0.17 ± 0.17 Aa | 1.00 ± 0.37 Aab                                                                                                                                | 0.33 ± 0.33 Aa  |
| 15 Apr. 2021                   | 0.50 ± 0.34 Aab                                                                                                                                 | 0.00 ± 0.00 Aa | 1.33 ± 0.33 Ad                                                                                                                                    | 0.50 ± 0.50 Aa | 1.50 ± 0.62 Aab                                                                                                                                | 0.00 ± 0.00 Ba  |
| 22 Apr. 2021                   | 0.17 ± 0.17 Aab                                                                                                                                 | 0.17 ± 0.17 Aa | 0.67 ± 0.33 Ad                                                                                                                                    | 0.00 ± 0.00 Aa | 1.33 ± 0.49 Aab                                                                                                                                | 0.00 ± 0.00 Ba  |
| 27 Apr. 2021                   | 0.17 ± 0.17 Aab                                                                                                                                 | 0.00 ± 0.00 Aa | 1.50 ± 0.22 Acd                                                                                                                                   | 0.00 ± 0.00 Ba | 1.00 ± 0.52 Aab                                                                                                                                | 0.00 ± 0.00 Aa  |
| 29 Apr. 2021                   | 0.00 ± 0.00 Ab                                                                                                                                  | 0.00 ± 0.00 Aa | 2.17 ± 0.60 Abcd                                                                                                                                  | 0.17 ± 0.17 Ba | 0.83 ± 0.31 Ab                                                                                                                                 | 0.00 ± 0.00 Ba  |
| 30 Apr. 2021                   | 0.00 ± 0.00 Ab                                                                                                                                  | 0.00 ± 0.00 Aa | 2.67 ± 0.56 Aabcd                                                                                                                                 | 0.17 ± 0.17 Ba | 2.33 ± 0.71 Aab                                                                                                                                | 0.00 ± 0.00 Ba  |
| 6 May 2021                     | 2.00 ± 1.03 Aa                                                                                                                                  | 0.33 ± 0.21 Aa | 5.33 ± 1.41 Aa                                                                                                                                    | 0.33 ± 0.33 Ba | 2.33 ± 0.71 Aab                                                                                                                                | 0.33 ± 0.33 Ba  |
| 14 May 2021                    | 0.17 ± 0.17 Aab                                                                                                                                 | 0.00 ± 0.00 Aa | 4.33 ± 0.80 Aabc                                                                                                                                  | 0.00 ±0.00 Ba  | 3.67 ± 0.92 Aa                                                                                                                                 | 1.00 ± 0.68 Ba  |
| 20 May 2021                    | 1.00 ± 0.63 Aab                                                                                                                                 | 0.00 ± 0.00 Aa | 4.83 ± 0.60 Aab                                                                                                                                   | 0.33 ± 0.21 Ba | 2.83 ± 0.65 Aab                                                                                                                                | 0.00 ± 0.00 Ba  |

|                          |                                                                                                                                                        |                |                                                                                                                                                           |                 |                                                                                                                                                           |                |
|--------------------------|--------------------------------------------------------------------------------------------------------------------------------------------------------|----------------|-----------------------------------------------------------------------------------------------------------------------------------------------------------|-----------------|-----------------------------------------------------------------------------------------------------------------------------------------------------------|----------------|
| 28 May 2021              | 0.00 ± 0.00 Ab                                                                                                                                         | 0.00 ± 0.00 Aa | 0.50 ± 0.34 Ad                                                                                                                                            | 0.67 ± 0.33 Aa  | 0.50 ± 0.50 Ab                                                                                                                                            | 0.50 ± 0.50 Aa |
| 8 June 2021              | 0.00 ± 0.00 Ab                                                                                                                                         | 0.00 ± 0.00 Aa | 0.00 ± 0.00 Ad                                                                                                                                            | 0.50 ± 0.34 Aa  | 0.17 ± 0.17 Ab                                                                                                                                            | 0.17 ± 0.17 Aa |
| 2-way ANOVA              | Groundcover: F <sub>1,110</sub> =7.04, p=0.0091;<br>Date: F <sub>10,110</sub> =3.17, p=0.0013;<br>Groundcover*Date: F <sub>10,110</sub> =1.87, p=0.055 |                | Groundcover: F <sub>1,110</sub> =91.22, p< 0.0001;<br>Date: F <sub>10,110</sub> =7.37, p<0.0001;<br>Groundcover*Date: F <sub>10,110</sub> =8.16, p<0.0001 |                 | Groundcover: F <sub>1,110</sub> =49.35, p<0.0001;<br>Date: F <sub>10,110</sub> =3.59, p= 0.0004;<br>Groundcover*Date: F <sub>10,110</sub> =2.32, p=0.0161 |                |
| Wild bees                |                                                                                                                                                        |                |                                                                                                                                                           |                 |                                                                                                                                                           |                |
|                          | Year 2019                                                                                                                                              |                |                                                                                                                                                           |                 |                                                                                                                                                           |                |
| Orchard /Date            | IPM (2 sites)                                                                                                                                          |                | OP                                                                                                                                                        |                 | OG                                                                                                                                                        |                |
|                          | Site a                                                                                                                                                 | Site b         |                                                                                                                                                           |                 |                                                                                                                                                           |                |
| 01 May 2019              | 0.00 ± 0.00                                                                                                                                            | 0.00 ± 0.00    | 0.00 ± 0.00                                                                                                                                               |                 | 0.00 ± 0.00                                                                                                                                               |                |
| 17 May 2019              | 0.00 ± 0.00                                                                                                                                            | 0.00 ± 0.00    | 0.00 ± 0.00                                                                                                                                               |                 | 0.00 ± 0.00                                                                                                                                               |                |
| 22 June 2019             | 0.00 ± 0.00                                                                                                                                            | 0.00 ± 0.00    | 0.00 ± 0.00                                                                                                                                               |                 | 0.17 ± 0.17                                                                                                                                               |                |
| 2-way ANOVA              | Orchard: F <sub>2,63</sub> =1.57, p=0.215; Date: F <sub>2,63</sub> =1.68, p=0.1946; Orchard *Date: F <sub>4,63</sub> =1.57, p=0.1919                   |                |                                                                                                                                                           |                 |                                                                                                                                                           |                |
|                          | Year 2020                                                                                                                                              |                |                                                                                                                                                           |                 |                                                                                                                                                           |                |
| Orchard /Treatment/ Date | IPM                                                                                                                                                    |                | OP                                                                                                                                                        |                 | OG                                                                                                                                                        |                |
|                          | FM                                                                                                                                                     | NV             | FM                                                                                                                                                        | NV              | FM                                                                                                                                                        | NV             |
| 13 Apr. 2020             | 4.00 ± 1.15 Aab                                                                                                                                        | 0.00 ± 0.00 Ba | 9.00 ± 1.13 Aa                                                                                                                                            | 0.33 ± 0.21 Bb  | 6.00 ± 0.73 Abc                                                                                                                                           | 0.5 ± 0.34 Ba  |
| 17 Apr. 2020             | 4.83 ± 0.79 Aab                                                                                                                                        | 0.00 ± 0.00 Ba | 11.17± 2.89 Aa                                                                                                                                            | 0.88 ± 0.48 Bb  | 2.17 ± 3.13 Aa                                                                                                                                            | 0.00 ± 0.00 Ba |
| 25 Apr. 2020             | 7.33 ± 2.12 Aa                                                                                                                                         | 0.00 ± 0.00 Ba | 5.17 ± 1.19 Aab                                                                                                                                           | 2.50 ± 0.56 Aa  | 8.67 ± 1.52 Aab                                                                                                                                           | 0.50 ± 0.50 Ba |
| 08 May 2020              | 2.83 ± 0.60 Aab                                                                                                                                        | 0.83 ± 0.54 Ba | 5.17 ± 2.66 Aab                                                                                                                                           | 0.50 ± 0.34 Ab  | 2.00 ± 0.52 Acd                                                                                                                                           | 0.17 ± 0.17 Ba |
| 16 May 2020              | 2.50 ± 0.72 Aab                                                                                                                                        | 0.67 ± 0.49 Aa | 1.17 ± 0.98 Ab                                                                                                                                            | 0.17 ± 0.17 Ab  | 0.33 ± 0.33 Acd                                                                                                                                           | 0.17 ± 0.17 Aa |
| 25 May 2020              | 1.83 ± 1.01 Ab                                                                                                                                         | 0.00 ± 0.00 Aa | 1.00 ± 0.82 Ab                                                                                                                                            | 0.17 ± 0.17 Ab  | 0.83 ± 0.40 Acd                                                                                                                                           | 1.17 ± 0.98 Aa |
| 12 June 2020             | 1.83 ± 0.54 Aab                                                                                                                                        | 0.00 ± 0.00 Ba | 0.00 ± 0.00 Ab                                                                                                                                            | 0.00 ± 0.00 Ab  | 0.00 ± 0.00 Ad                                                                                                                                            | 0.00 ± 0.00 Aa |
| 26 June 2020             | 3.00 ± 1.21 Aab                                                                                                                                        | 0.00 ± 0.00 Ba | 0.00 ± 0.00 Ab                                                                                                                                            | 0.00 ± 0.00 Ab  | 0.00 ± 0.00 Ad                                                                                                                                            | 0.00 ± 0.00 Aa |
| 2-way ANOVA              | Groundcover: F <sub>1,80</sub> =66.59, p<0.0001; Date: F <sub>7,80</sub> =2.38, p=0.0285; Groundcover*Date: F <sub>7,80</sub> =2.93, p=0.0089          |                | Groundcover: F <sub>1,70</sub> =38.62, p< 0.0001; Date: F <sub>6,70</sub> =7.25, p<0.0001; Groundcover*Date: F <sub>6,70</sub> =5.63, p<0.0001            |                 | Groundcover: F <sub>1,70</sub> =51.82, p< 0.0001; Date: F <sub>6,70</sub> =10.58, p<0.0001; Groundcover*Date: F <sub>6,70</sub> =11.23, p<0.0001          |                |
|                          | Year 2021                                                                                                                                              |                |                                                                                                                                                           |                 |                                                                                                                                                           |                |
| Orchard /Treatment/ Date | IPM                                                                                                                                                    |                | OP                                                                                                                                                        |                 | OG                                                                                                                                                        |                |
|                          | FM                                                                                                                                                     | NV             | FM                                                                                                                                                        | NV              | FM                                                                                                                                                        | NV             |
| 09 Apr. 2021             | 3.67 ± 1.43 Aab                                                                                                                                        | 0.00 ± 0.00 Bb | 6.67 ± 2.36 Aabc                                                                                                                                          | 0.67 ± 0.33 Bab | 4.50 ± 1.18 Aa                                                                                                                                            | 0.67 ± 0.33 Ba |
| 15 Apr. 2021             | 5.67 ± 1.12 Aab                                                                                                                                        | 0.00 ± 0.00 Bb | 3.17 ± 0.60 Abcd                                                                                                                                          | 0.67 ± 0.33 Bab | 3.50 ± 0.92 Aabc                                                                                                                                          | 0.17 ± 0.17 Ba |
| 22 Apr. 2021             | 4.00 ± 0.68 Aab                                                                                                                                        | 0.00 ± 0.00 Bb | 3.50 ± 0.85 Aabcd                                                                                                                                         | 1.17 ± 0.31 Bab | 3.50 ± 0.50 Aabc                                                                                                                                          | 0.33 ± 0.21 Ba |
| 27 Apr. 2021             | 3.33 ± 0.67 Aab                                                                                                                                        | 0.17 ± 0.17 Bb | 3.00 ± 0.63 Abcd                                                                                                                                          | 0.17 ± 0.17 Bb  | 2.00 ± 0.82 Aabcde                                                                                                                                        | 0.50 ± 0.50 Aa |
| 29 Apr. 2021             | 3.33 ± 0.21 Aab                                                                                                                                        | 0.17 ± 0.17 Bb | 2.33 ± 0.56 Acd                                                                                                                                           | 1.83 ± 0.31 Aa  | 1.33 ± 0.49 Abcde                                                                                                                                         | 1.00 ± 0.37 Aa |
| 30 Apr. 2021             | 2.50 ± 1.02 Aab                                                                                                                                        | 1.33 ± 0.61 Aa | 1.17 ± 0.40 Ad                                                                                                                                            | 0.17 ± 0.17 Bb  | 1.17 ± 0.60 Abcde                                                                                                                                         | 0.17 ± 0.17 Aa |

|              |                                                                                                                                                                                                                           |                        |                                                                                                                                                                                                                                 |                        |                                                                                                                                                                                                                                |                       |
|--------------|---------------------------------------------------------------------------------------------------------------------------------------------------------------------------------------------------------------------------|------------------------|---------------------------------------------------------------------------------------------------------------------------------------------------------------------------------------------------------------------------------|------------------------|--------------------------------------------------------------------------------------------------------------------------------------------------------------------------------------------------------------------------------|-----------------------|
| 06 May 2021  | <b>1.67 ± 0.76 Ab</b>                                                                                                                                                                                                     | <b>0.00 ± 0.00 Bb</b>  | 2.33 ± 0.61 Acd                                                                                                                                                                                                                 | 0.83 ± 0.40 Aab        | 0.33 ± 0.33 Ade                                                                                                                                                                                                                | 0.17 ± 0.17 Aa        |
| 14 May 2021  | <b>2.17 ± 0.65 Aab</b>                                                                                                                                                                                                    | <b>0.17 ± 0.17 Bb</b>  | 0.83 ± 0.40 Ad                                                                                                                                                                                                                  | 0.33 ± 0.21 Aab        | 0.50 ± 0.34 Acde                                                                                                                                                                                                               | 0.00 ± 0.00 Aa        |
| 20 May 2021  | <b>1.67 ± 0.61 Ab</b>                                                                                                                                                                                                     | <b>0.00 ± 0.00 Bb</b>  | <b>3.00 ± 0.68 Abcd</b>                                                                                                                                                                                                         | <b>0.00 ± 0.00 Bb</b>  | 0.00 ± 0.00 Ae                                                                                                                                                                                                                 | 0.00 ± 0.00 Aa        |
| 28 May 2021  | <b>3.83 ± 1.01 Aab</b>                                                                                                                                                                                                    | <b>0.67 ± 0.33 Bab</b> | <b>8.17 ± 1.28 Aa</b>                                                                                                                                                                                                           | <b>0.17 ± 0.17 Bb</b>  | <b>4.17 ± 0.65 Aab</b>                                                                                                                                                                                                         | <b>0.33 ± 0.33 Ba</b> |
| 08 June 2021 | <b>6.50 ± 1.48 Aa</b>                                                                                                                                                                                                     | <b>0.00 ± 0.00 Bb</b>  | <b>7.67 ± 0.76 Aab</b>                                                                                                                                                                                                          | <b>1.17 ± 0.65 Bab</b> | <b>3.33 ± 0.61 Aabcd</b>                                                                                                                                                                                                       | <b>0.00 ± 0.00 Ba</b> |
| 2-way ANOVA  | <b>Groundcover: <math>F_{1,110}=122.74</math>,<br/><math>p&lt;0.0001</math>; Date: <math>F_{10,110}=2.38</math>,<br/><math>p=0.0135</math>; Groundcover*Date:<br/><math>F_{10,110}=2.95</math>, <math>p=0.0025</math></b> |                        | <b>Groundcover: <math>F_{1,110}=101.27</math>, <math>p&lt;0.0001</math>;<br/>Date: <math>F_{10,110}=6.39</math>, <math>p&lt;0.0001</math>;<br/>Groundcover*Date: <math>F_{10,110}=6.06</math>,<br/><math>p&lt;0.0001</math></b> |                        | <b>Groundcover: <math>F_{1,110}=79.85</math>, <math>p&lt;0.0001</math>;<br/>Date: <math>F_{10,110}=6.09</math>, <math>p&lt;0.0001</math>;<br/>Groundcover*Date: <math>F_{10,110}=5.01</math>,<br/><math>p&lt;0.0001</math></b> |                       |

Capital letters indicate significant differences between treatments while small letters indicate significant differences between assessment dates. Bold fonts indicate significant statistical differences in 2 way-ANOVA.

IPM: IPM orchard, OP: Organic palmette orchard, OG: Organic goblet orchard,

**Table S2.** Mean number of honey bee and wild bee visits/plot/1' ( $\pm$  s.e.m.) on the apple tree blossoms adjacent to the sown flowering mixture (FM) patches and the natural vegetation (NV) patches of groundcover, at three apple orchards (IPM, OP, OG), in years 2019, 2020, 2021 (recordings from April to June).

| Honey bees                     |                                                                                                                                                             |                       |                                                                                                                                                                         |                        |                                                                                                                                                                    |                 |
|--------------------------------|-------------------------------------------------------------------------------------------------------------------------------------------------------------|-----------------------|-------------------------------------------------------------------------------------------------------------------------------------------------------------------------|------------------------|--------------------------------------------------------------------------------------------------------------------------------------------------------------------|-----------------|
|                                | Baseline Year 2019                                                                                                                                          |                       |                                                                                                                                                                         |                        |                                                                                                                                                                    |                 |
| Orchard /Date                  | IPM (2 sites)                                                                                                                                               |                       | OP                                                                                                                                                                      |                        | OG                                                                                                                                                                 |                 |
|                                | Site a                                                                                                                                                      | Site b                |                                                                                                                                                                         |                        |                                                                                                                                                                    |                 |
| 23 Apr. 2019                   | 11.50 ± 1.84                                                                                                                                                | 11.00 ± 1.50          | 9.17 ± 4.80                                                                                                                                                             |                        | 10.00 ± 1.15                                                                                                                                                       |                 |
| 01 May 2019                    | 2.50 ±1.08                                                                                                                                                  | 3.33 ± 0.84           | 4.83 ± 0.94                                                                                                                                                             |                        | 10.33 ± 1.68                                                                                                                                                       |                 |
| 2-way ANOVA                    | Orchard: F <sub>3,40</sub> =1.06, p=0.3763; Date: F <sub>1,40</sub> = <b>11.67</b> , <b>p=0.0015</b> ; Orchard *Date: F <sub>3,40</sub> =1.89, p=0.1465     |                       |                                                                                                                                                                         |                        |                                                                                                                                                                    |                 |
|                                | Year 2020                                                                                                                                                   |                       |                                                                                                                                                                         |                        |                                                                                                                                                                    |                 |
| Orchard<br>/Treatment/<br>Date | IPM                                                                                                                                                         |                       | OP                                                                                                                                                                      |                        | OG                                                                                                                                                                 |                 |
|                                | FM                                                                                                                                                          | NV                    | FM                                                                                                                                                                      | NV                     | FM                                                                                                                                                                 | NV              |
| 13 Apr. 2020                   | 4.33 ± 1.45 Ab                                                                                                                                              | 6.33 ± 1.02 Ab        | 1.83 ± 0.79 Ac                                                                                                                                                          | 2.33 ± 0.55 Ac         | 3.17 ± 1.42 Ab                                                                                                                                                     | 1.33 ± 0.71 Ab  |
| 17 Apr. 2020                   | 36.17 ± 2.71 Aa                                                                                                                                             | 37.00 ± 5.85 Aa       | <b>9.83 ± 0.98 Bb</b>                                                                                                                                                   | <b>18.83 ± 2.08 Ab</b> | 15.33 ± 1.83 Aa                                                                                                                                                    | 17.16 ± 2.38 Aa |
| 25 Apr. 2020                   | 11.50 ± 1.87 Ab                                                                                                                                             | 8.00 ± 0.85 Ab        | 31.00 ± 3.50 Aa                                                                                                                                                         | 27.66 ± 2.01 Aa        | 26.33 ± 5.58 Aa                                                                                                                                                    | 23.66 ± 6.05 Aa |
| 2-way ANOVA                    | <b>Groundcover: F<sub>1,30</sub>=0.009, p=0.9248; Date: F<sub>2,30</sub>=69.99, p&lt;0.0001; Groundcover*Date: F<sub>2,30</sub>=0.51, p=0.6034</b>          |                       | Groundcover: F <sub>1,30</sub> =1.68, p= 0.2042; Date: F <sub>2,30</sub> = <b>99.02</b> , <b>p&lt;0.0001</b> ; <b>Groundcover*Date: F<sub>2,30</sub>=5.29, p=0.0107</b> |                        | Groundcover: F <sub>1,30</sub> =0.09, p= 0.7669; Date: F <sub>2,30</sub> = <b>19.87</b> , <b>p&lt;0.0001</b> ; Groundcover*Date: F <sub>2,30</sub> =0.21, p=0.8068 |                 |
|                                | Year 2021                                                                                                                                                   |                       |                                                                                                                                                                         |                        |                                                                                                                                                                    |                 |
| v/Treatment/<br>Date           | IPM                                                                                                                                                         |                       | OP                                                                                                                                                                      |                        | OG                                                                                                                                                                 |                 |
|                                | FM                                                                                                                                                          | NV                    | FM                                                                                                                                                                      | NV                     | FM                                                                                                                                                                 | NV              |
| 15 Apr. 2021                   | 0.83 ± 0.54 Ac                                                                                                                                              | 0.5 ± 0.5 Ac          | 0.17 ± 0.17 Ac                                                                                                                                                          | 0.33 ± 0.33 Ab         | 0.00 ± 0.00 b                                                                                                                                                      | 0.00 ± 0.00 b   |
| 22 Apr. 2021                   | 20.50 ± 3.05 Aa                                                                                                                                             | 25.83 ± 2.37 Aa       | 0.33 ± 0.33 Ac                                                                                                                                                          | 0.66 ± 0.42 Ab         | 10.16 ± 1.85 b                                                                                                                                                     | 5.50 ± 1.23 b   |
| 27 Apr. 2021                   | 21.33 ± 1.72 Aa                                                                                                                                             | 22.83 ± 1.81 Aa       | 11.00 ± 2.50 Ab                                                                                                                                                         | 14.66 ± 2.53 Aa        | 38.00 ± 4.75 a                                                                                                                                                     | 34.16 ± 5.27 a  |
| 29 Apr. 2021                   | 18.5 ± 0.42 Aab                                                                                                                                             | 15.5 ± 1.47 Ab        | <b>22.83 ± 3.39 Aa</b>                                                                                                                                                  | <b>12.67 ± 2.49 Ba</b> | 36.17 ± 3.55 a                                                                                                                                                     | 30.67 ± 2.80 a  |
| 30 Apr. 2021                   | <b>12.0 ± 1.06 Ab</b>                                                                                                                                       | <b>5.33 ± 0.91 Bc</b> | 15.33 ± 2.67 Aab                                                                                                                                                        | 10.66 ± 1.80 Aa        | 34.50 ± 6.85 a                                                                                                                                                     | 29.67 ± 2.95 a  |
| 2-way ANOVA                    | Groundcover: F <sub>1,50</sub> =0.38, p=0.5382; <b>Date: F<sub>4,50</sub>=69.73, p&lt;0.0001</b> ; <b>Groundcover*Date: F<sub>4,50</sub>=3.93, p=0.0074</b> |                       | Groundcover: F <sub>1,50</sub> =2.75, p=0.1029; <b>Date: F<sub>4,50</sub>=31.04, p&lt;0.0001</b> ; <b>Groundcover*Date: F<sub>4,50</sub>=3.51, p=0.0132</b>             |                        | Groundcover: F <sub>1,50</sub> =2.69, p=0.1068; <b>Date: F<sub>4,50</sub>=42.38, p&lt;0.0001</b> ; Groundcover*Date: F <sub>4,50</sub> =0.18, p=0.9467             |                 |
| Wild bees                      |                                                                                                                                                             |                       |                                                                                                                                                                         |                        |                                                                                                                                                                    |                 |
|                                | Year 2019                                                                                                                                                   |                       |                                                                                                                                                                         |                        |                                                                                                                                                                    |                 |
| Orchard /Date                  | IPM (2 sites)                                                                                                                                               |                       | OP                                                                                                                                                                      |                        | OG                                                                                                                                                                 |                 |
|                                | Site a                                                                                                                                                      | Site b                |                                                                                                                                                                         |                        |                                                                                                                                                                    |                 |
| 23 Apr. 2019                   | 0.00 ± 0.00                                                                                                                                                 | 0.00 ± 0.00           | 0.00 ± 0.00                                                                                                                                                             |                        | 0.00 ± 0.00                                                                                                                                                        |                 |
| 01 May 2019                    | 0.00 ± 0.00                                                                                                                                                 | 0.00 ± 0.00           | 0.00 ± 0.00                                                                                                                                                             |                        | 0.00 ± 0.00                                                                                                                                                        |                 |
| 2-way ANOVA                    | n.a.                                                                                                                                                        |                       |                                                                                                                                                                         |                        |                                                                                                                                                                    |                 |

|                                | Year 2020                                                                                                                                                   |               |                                                                                                                                                            |                       |                                                                                                                                                       |             |
|--------------------------------|-------------------------------------------------------------------------------------------------------------------------------------------------------------|---------------|------------------------------------------------------------------------------------------------------------------------------------------------------------|-----------------------|-------------------------------------------------------------------------------------------------------------------------------------------------------|-------------|
| Orchard<br>/Treatment/<br>Date | IPM                                                                                                                                                         |               | OP                                                                                                                                                         |                       | OG                                                                                                                                                    |             |
|                                | FM                                                                                                                                                          | NV            | FM                                                                                                                                                         | NV                    | FM                                                                                                                                                    | NV          |
| 13 Apr. 2020                   | 1.33 ± 1.14 a                                                                                                                                               | 0.66 ± 0.49 a | 0.00 ± 0.00                                                                                                                                                | 0.00 ± 0.00           | 0.66 ± 0.49                                                                                                                                           | 0.00 ± 0.00 |
| 17 Apr. 2020                   | 3.33 ± 1.45 a                                                                                                                                               | 2.66 ± 1.54 a | 0.67 ± 0.49                                                                                                                                                | 0.33 ± 0.33           | 0.67 ± 0.67                                                                                                                                           | 2.83 ± 1.55 |
| 25 Apr. 2020                   | 0.33 ± 0.33 a                                                                                                                                               | 0.50 ± 0.50 a | 0.50 ± 0.50                                                                                                                                                | 0.00 ± 0.00           | 0.33 ± 0.33                                                                                                                                           | 0.33 ± 0.33 |
| 2-way ANOVA                    | Groundcover: F <sub>1,30</sub> =0.21, p= 0.6481;<br><b>Date: F<sub>2,30</sub>=3.43, p=0.0452;</b><br>Groundcover*Date: F <sub>2,30</sub> =0.10,<br>p=0.8976 |               | Groundcover: F <sub>1,30</sub> =1.14, p=0.2928;<br>Date: F <sub>2,30</sub> =1.23, p=0.3042;<br>Groundcover*Date: F <sub>2,30</sub> =0.32,<br>p=0.7278      |                       | Groundcover: F <sub>1,30</sub> =0.67, p=0.4182;<br>Date: F <sub>2,30</sub> =2.40, p=0.1075;<br>Groundcover*Date: F <sub>2,30</sub> =1.97,<br>p=0.1568 |             |
|                                | Year 2021                                                                                                                                                   |               |                                                                                                                                                            |                       |                                                                                                                                                       |             |
| Orchard<br>/Treatment/<br>Date | IPM                                                                                                                                                         |               | OP                                                                                                                                                         |                       | OG                                                                                                                                                    |             |
|                                | FM                                                                                                                                                          | NV            | FM                                                                                                                                                         | NV                    | FM                                                                                                                                                    | NV          |
| 22 Apr. 2021                   | 0.17 ± 0.17                                                                                                                                                 | 0.33 ± 0.33   | 0.00 ± 0.00 Ab                                                                                                                                             | 0.00 ± 0.00 Aa        | 0.00 ± 0.00                                                                                                                                           | 0.33 ± 0.33 |
| 27 Apr. 2021                   | 1.00 ± 0.44                                                                                                                                                 | 0.17 ± 0.17   | 0.67 ± 0.33 Ab                                                                                                                                             | 0.17 ± 0.17 Aa        | 0.83 ± 0.65                                                                                                                                           | 1.00 ± 0.26 |
| 29 Apr. 2021                   | 0.00 ± 0.00                                                                                                                                                 | 0.00 ± 0.00   | <b>2.67 ± 0.71 Aa</b>                                                                                                                                      | <b>0.00 ± 0.00 Ba</b> | 1.17 ± 0.83                                                                                                                                           | 1.00 ± 0.68 |
| 30 Apr. 2021                   | 0.50 ± 0.34                                                                                                                                                 | 0.00 ± 0.00   | <b>1.17 ± 0.40 Aab</b>                                                                                                                                     | <b>0.17 ± 0.17 Ba</b> | 0.83 ± 0.30                                                                                                                                           | 0.33 ± 0.33 |
| 2-way ANOVA                    | Groundcover: F <sub>1,50</sub> =2.81, p= 0.0996;<br>Date: F <sub>4,50</sub> =2.38, p=0.0636;<br>Groundcover*Date: F <sub>4,50</sub> =1.81,<br>p=0.1415      |               | <b>Groundcover: F<sub>1,50</sub>=20.69,<br/>p=0.0001; Date: F<sub>4,50</sub>=7.31,<br/>p=0.0001; Groundcover*Date:<br/>F<sub>4,50</sub>=7.28, p=0.0001</b> |                       | Groundcover: F <sub>1,50</sub> =0.01, p=0.906;<br>Date: F <sub>4,50</sub> =2.20, p=0.0819;<br>Groundcover*Date: F <sub>4,50</sub> =0.26,<br>p=0.9018  |             |

Capital letters indicate significant differences between treatments while small letters indicate significant differences between assessment dates. Bold fonts indicate significant statistical differences in 2 way-ANOVA.

IPM: IPM orchard, OP: Organic palmette orchard, OG: Organic goblet orchard
